# Supplementary material for: Neurally mediated syncope diagnosis based on adenylate cyclase activity in Japanese patients
Source: PubMed Central journal article supplement (PMC6472876; doi:10.1371/journal.pone.0214733), 2019-04-18
Supplement: pone.0214733.s001.pdf [file pone.0214733.s001.pdf]

**Supplementary S1 Table. An example of the raw data of healthy volunteer (C48)**

|                     | C48-1   |          | Baseline | C48-2    | 70°      | C48-3    | 10 minutes | C48-4    | 20 minutes |          |         |          |          |
|---------------------|---------|----------|----------|----------|----------|----------|------------|----------|------------|----------|---------|----------|----------|
|                     | Average | C3-      |          | Average  |          | Average  |            | Average  |            |          |         |          |          |
| BLANK               | 0       | 1609648  | 0        | 1645505  |          | 1666010  |            | 1550813  |            |          |         |          |          |
| cAMP 1.95uM         | 1950000 | 46647.3  | 1563001  |          |          |          |            |          |            |          |         |          |          |
| cAMP 781nM          | 781000  | 44777.17 | 1564871  |          |          |          |            |          |            |          |         |          |          |
| cAMP 312nM          | 312000  | 45511.92 | 1564136  |          |          |          |            |          |            |          |         |          |          |
| cAMP 125nM          | 125000  | 63706.78 | 1545942  |          |          |          |            |          |            |          |         |          |          |
| cAMP 50nM           | 50000   | 445662   | 1163986  |          |          |          |            |          |            |          |         |          |          |
| cAMP 20nM           | 20000   | 1172298  | 437350   |          |          |          |            |          |            |          |         |          |          |
| cAMP 8nM            | 8000    | 1464182  | 145466.7 |          |          |          |            |          |            |          |         |          |          |
| cAMP 3.2nM          | 3200    | 1575528  | 34120    |          |          |          |            |          |            |          |         |          |          |
| cAMP 1.28nM         | 1280    | 1561903  | 47745    |          |          |          |            |          |            |          |         |          |          |
|                     |         | C37-     |          | G37-     |          | K37-     |            | O37-     |            |          |         |          |          |
| Forskolin 100uM     | 100000  | 89217.35 | 1612208  | 94675.9  | 1677886  | 92525.97 | 1666964    | 77569.02 | 1671330    |          |         |          |          |
| Forskolin 20uM      | 20000   | 320368   | 1381057  | 350258.7 | 1422303  | 474948.2 | 1284542    | 388200   | 1360699    |          |         |          |          |
| Forskolin 4uM       | 4000    | 1278022  | 423403.3 | 1367338  | 405223.3 | 1366693  | 392796.7   | 1389548  | 359350.8   |          |         |          |          |
| Forskolin 800nM     | 800     | 1639190  | 62235    | 1695252  | 77310    | 1635700  | 123790     | 1699653  | 49245.76   |          |         |          |          |
| Forskolin 160nM     | 160     | 1694570  | 6855     | 1754340  | 18221.67 | 1733573  | 25916.67   | 1774352  | -25452.6   |          |         |          |          |
| Forskolin 32nM      | 32      | 1759188  | -57763.3 | 1804000  | -31438.3 | 1727340  | 32150      | 1800207  | -51307.6   |          |         |          |          |
|                     |         | /D14     |          | /H14     |          | /L14     |            | /P14     |            |          |         |          |          |
| Isoproterenol 5mM   | 5000000 | 756389.7 | 945035.3 | 0.586175 | 798097.3 | 974464.3 | 0.580769   | 842956   | 916534     | 0.549822 | 807190  | 941709.1 | 0.563449 |
| Isoproterenol 500uM | 500000  | 837539   | 863886   | 0.53584  | 938104.8 | 834456.8 | 0.497326   | 1004642  | 754848.3   | 0.452828 | 1007083 | 741815.9 | 0.443848 |
| Isoproterenol 50uM  | 50000   | 985475   | 715950   | 0.444081 | 1126712  | 645850   | 0.384919   | 1156723  | 602766.7   | 0.361595 | 1044013 | 704885.8 | 0.421751 |
| Isoproterenol 5uM   | 5000    | 1042006  | 659418.7 | 0.409016 | 1271348  | 501213.3 | 0.298717   | 1265112  | 494378.3   | 0.296574 | 1222448 | 526450.8 | 0.314989 |
| Isoproterenol 500nM | 500     | 1302423  | 399001.7 | 0.247488 | 1427077  | 345485   | 0.205905   | 1402105  | 357385     | 0.214393 | 1390922 | 357977.4 | 0.214187 |
| Isoproterenol 50nM  | 50      | 1623652  | 77773.33 | 0.04824  | 1651498  | 121063.3 | 0.072152   | 1716873  | 42616.67   | 0.025565 | 1744130 | 4769.091 | 0.002853 |
| Isoproterenol 5nM   | 5       | 1743805  | -42380   | -0.02629 | 1780632  | -8070    | -0.00481   | 1757625  | 1865       | 0.001119 | 1838933 | -90034.2 | -0.05387 |
| Adrenaline 1mM      | 1000000 | 797262.7 | 904162.3 | 0.560823 | 866755.5 | 905806.2 | 0.53985    | 873575   | 885915     | 0.531454 | 857698  | 891201.1 | 0.533229 |
| Adrenaline 100uM    | 100000  | 942679.2 | 758745.8 | 0.470625 | 1078878  | 693683.3 | 0.413427   | 1153960  | 605530     | 0.363253 | 1115347 | 633552.4 | 0.379071 |
| Adrenaline 10uM     | 10000   | 1101728  | 599696.7 | 0.371972 | 1276995  | 495566.7 | 0.295352   | 1259922  | 499568.3   | 0.299688 | 1239183 | 509715.8 | 0.304976 |
| Adrenaline 1uM      | 1000    | 1419763  | 281661.7 | 0.174706 | 1516183  | 256378.3 | 0.152798   | 1532838  | 226651.7   | 0.135967 | 1507078 | 241820.8 | 0.144688 |
| Adrenaline 100nM    | 100     | 1657878  | 43546.67 | 0.027011 | 1719248  | 53313.33 | 0.031774   | 1722903  | 36586.67   | 0.021948 | 1718305 | 30594.09 | 0.018305 |
| Adrenaline 10nM     | 10      | 1656835  | 44590    | 0.027658 | 1743162  | 29400    | 0.017522   | 1724742  | 34748.33   | 0.020845 | 1737262 | 11637.42 | 0.006963 |
| Adrenaline 1nM      | 1       | 1722678  | -21253.3 | -0.01318 | 1843763  | -71200.8 | -0.04243   | 1760940  | -1450      | -0.00087 | 1785720 | -36820.9 | -0.02203 |
| Lymphocyte only     |         | 1701425  |          |          | 1772562  |          |            | 1759490  |            |          | 1748899 |          |          |
