# Supplementary material for: Neurally mediated syncope diagnosis based on adenylate cyclase activity in Japanese patients
Source: PubMed Central journal article supplement (PMC6472876; doi:10.1371/journal.pone.0214733), 2019-04-18
Supplement: pone.0214733.s002.pdf [file pone.0214733.s002.pdf]

**S2 Table. The raw data of adenylate cyclase activities from 22 healthy volunteers and 18 NMS patients at rest time by adrenaline (AD) and isoproterenol (IP).**

| Healthy n=22        | 1        | 2        | 3        | 4        | 5        | 6        | 7        | 8        | 9        | 10       | 11       | 12       | 13       | 14       | 15       | 16       | 17       | 18       | 19              | 20       | 21       | 22       | Ave.            | SD       |
|---------------------|----------|----------|----------|----------|----------|----------|----------|----------|----------|----------|----------|----------|----------|----------|----------|----------|----------|----------|-----------------|----------|----------|----------|-----------------|----------|
|                     | C11      | C12      | C15      | C18      | C19      | C21      | C22      | C27      | C31      | C32      | C34      | C36      | C37      | C38      | C40      | C41      | C44      | C45      | C46             | C48      | C51      | C53      |                 |          |
| Adrenaline 1mM      | 0.665778 | 0.709712 | 0.605874 | 0.679459 | 0.66414  | 0.648605 | 0.659015 | 0.627572 | 0.619857 | 0.598856 | 0.643871 | 0.521069 | 0.636478 | 0.680594 | 0.698643 | 0.653925 | 0.595107 | 0.618414 | 0.642209        | 0.560823 |          |          | <b>0.6365</b>   | 0.045584 |
| Adrenaline 100uM    | 0.382489 | 0.684619 | 0.517828 | 0.671012 | 0.483418 | 0.488458 | 0.535409 | 0.266942 | 0.689506 | 0.358322 | 0.529993 | 0.761974 | 0.473305 | 0.506677 | 0.504345 | 0.458885 | 0.500938 | 0.618381 | 0.585582        | 0.470625 | 0.61892  | 0.675834 | <b>0.53561</b>  | 0.119677 |
| Adrenaline 10uM     | 0.180688 | 0.493032 | 0.450436 | 0.620559 | 0.333002 | 0.222251 | 0.275791 | 0.114208 | 0.485896 | 0.247573 | 0.446659 | 0.648401 | 0.318276 | 0.261932 | 0.259273 | 0.111025 | 0.34603  | 0.394816 | 0.283347        | 0.371972 | 0.416767 | 0.504962 | <b>0.35395</b>  | 0.14584  |
| Adrenaline 1uM      | 0.107534 | 0.320296 | 0.283733 | 0.474591 | 0.154205 | 0.096315 | 0.210773 | 0.091961 | 0.238154 | 0.078    | 0.264956 | 0.276602 | 0.127793 | 0.113756 | 0.127035 | 0.07354  | 0.170153 | 0.155721 | 0.139345        | 0.174706 | 0.209908 | 0.233382 | <b>0.18738</b>  | 0.096448 |
| Adrenaline 100nM    | 0.00513  | 0.032779 | 0.096791 | 0.072024 | -0.01772 | 0.045393 | 0.006167 | -0.0068  | 0.020975 | 0.043213 | 0.056215 | 0.004949 | 0.000302 | -0.00944 | 0.049311 | 0.044332 | 0.020905 | -0.00616 | 0.014158        | 0.027011 |          |          | <b>0.02498</b>  | 0.029931 |
| Adrenaline 10nM     | 0.000772 | 0.038757 | 0.064506 | 0.007085 | -0.00368 | 0.001048 | 0.027036 | 0.006591 | -0.02026 | 0.019966 | 0.033297 | -0.01609 | -0.00296 | 0.035078 | 0.047313 | 0.020914 | 0.004542 | -0.01043 | 0.003003        | 0.027658 |          |          | <b>0.01421</b>  | 0.022315 |
| Adrenaline 1nM      | 0.019697 | -0.00545 | 0.036996 | -1.2E-05 | 0.030544 | -0.00934 | 0.036254 | -0.00643 | -0.02535 | 0.009534 | 0.027782 | -0.03253 | -0.01143 | 0.011143 | 0.010164 | 0.008347 | -0.00524 | -0.02445 | 0.006562        | -0.01318 |          |          | <b>0.00318</b>  | 0.020253 |
|                     | C11      | C12      | C15      | C18      | C19      | C21      | C22      | C27      | C31      | C32      | C34      | C36      | C37      | C38      | C40      | C41      | C44      | C45      | C46             | C48      | C51      | C53      |                 |          |
| Isoproterenol 5mM   | 0.669095 | 0.703023 | 0.623355 | 0.690352 | 0.673022 | 0.699203 | 0.708399 | 0.675712 | 0.69715  | 0.710542 | 0.703129 | 0.575502 | 0.66463  | 0.695884 | 0.692927 | 0.678168 | 0.611632 | 0.652262 | 0.66928         | 0.586175 |          |          | <b>0.66897</b>  | 0.040051 |
| Isoproterenol 500uM | 0.608009 | 0.757064 | 0.566149 | 0.687068 | 0.681287 | 0.630683 | 0.681743 | 0.517073 | 0.69555  | 0.681416 | 0.736972 | 0.685033 | 0.545955 | 0.627609 | 0.598349 | 0.549981 | 0.537974 | 0.685699 | 0.621838        | 0.53584  |          |          | <b>0.63156</b>  | 0.071952 |
| Isoproterenol 50uM  | 0.288006 | 0.546953 | 0.487765 | 0.651297 | 0.468436 | 0.3163   | 0.428554 | 0.180695 | 0.616843 | 0.362266 | 0.492994 | 0.765834 | 0.441879 | 0.351528 | 0.339658 | 0.216537 | 0.430339 | 0.513744 | 0.363962        | 0.444081 | 0.45709  | 0.590449 | <b>0.44342</b>  | 0.140251 |
| Isoproterenol 5uM   | 0.188182 | 0.496038 | 0.440036 | 0.658714 | 0.327386 | 0.204281 | 0.262864 | 0.12156  | 0.490538 | 0.277363 | 0.4665   | 0.640779 | 0.356776 | 0.255737 | 0.26817  | 0.113567 | 0.362864 | 0.43042  | 0.274708        | 0.409016 | 0.436873 | 0.527037 | <b>0.36406</b>  | 0.150783 |
| Isoproterenol 500nM | 0.123776 | 0.362219 | 0.331471 | 0.52107  | 0.203149 | 0.135653 | 0.22689  | 0.093842 | 0.329655 | 0.167712 | 0.343476 | 0.358901 | 0.149965 | 0.193664 | 0.172408 | 0.10231  | 0.212486 | 0.276707 | 0.196201        | 0.247488 | 0.295521 | 0.395715 | <b>0.24729</b>  | 0.109484 |
| Isoproterenol 50nM  | 0.037773 | 0.07921  | 0.117023 | 0.071785 | -0.02106 | 0.045873 | 0.008457 | 0.01532  | 0.021355 | 0.018697 | 0.050615 | -0.00447 | -0.03872 | 0.05684  | 0.102597 | 0.030603 | -0.00243 | 0.001456 | 0.010148        | 0.04824  |          |          | <b>0.03247</b>  | 0.039961 |
| Isoproterenol 5nM   | 0.010342 | 0.007737 | 0.026485 | 0.008271 | -0.0284  | 0.023353 | -0.01194 | -0.02223 | -0.01318 | -0.04152 | -0.00162 | -0.02807 | -0.02625 | -0.04086 | -0.00476 | 0.021786 | -0.0364  | -0.05255 | -0.00086        | -0.02629 |          |          | <b>-0.01185</b> | 0.023441 |
| NMS n=18            | 1        | 2        | 3        | 4        | 5        | 6        | 7        | 8        | 9        | 10       | 11       | 12       | 13       | 14       | 15       | 16       | 17       | 18       | Ave.            | SD       | T-test   |          |                 |          |
|                     | S006     | S010     | S011     | S012     | S013     | S014     | S018     | S020     | S022     | S023     | S025     | S027     | S028     | S030     | S033     | S038     | S039     | S040     |                 |          |          |          |                 |          |
| Adrenaline 1mM      | 0.685624 | 0.487138 | 0.750893 | 0.602188 | 0.703524 | 0.609078 | 0.701958 | 0.586864 | 0.672472 | 0.547432 |          |          |          |          |          |          |          |          | <b>0.63472</b>  | 0.081767 | 0.47496  |          |                 |          |
| Adrenaline 100uM    | 0.426003 | 0.684176 | 0.827716 | 0.477584 | 0.546374 | 0.459416 | 0.572592 | 0.60253  | 0.748171 | 0.425863 | 0.650868 | 0.567394 | 0.742349 | 0.653562 | 0.704688 | 0.431794 | 0.553276 | 0.498887 | <b>0.5874</b>   | 0.122585 | 0.093738 |          |                 |          |
| Adrenaline 10uM     | 0.256626 | 0.676036 | 0.696738 | 0.251743 | 0.307234 | 0.294726 | 0.462099 | 0.619195 | 0.617245 | 0.206934 | 0.380325 | 0.333458 | 0.29156  | 0.364902 | 0.546487 | 0.202504 | 0.184153 | 0.262383 | <b>0.38635</b>  | 0.172062 | 0.265172 |          |                 |          |
| Adrenaline 1uM      | 0.128737 | 0.2505   | 0.46025  | 0.119948 | 0.161568 | 0.172037 | 0.25945  | 0.355847 | 0.452598 | 0.098696 | 0.17769  | 0.07432  | 0.023519 | 0.250302 | 0.206664 | 0.11138  | 0.047194 | 0.063337 | <b>0.18967</b>  | 0.129226 | 0.475421 |          |                 |          |
| Adrenaline 100nM    | 0.002387 | 0.014842 | 0.035339 | -0.0088  | 0.009609 | 0.041574 | 0.021223 | 0.071953 | 0.023457 | 0.013837 |          |          |          |          |          |          |          |          | <b>0.02254</b>  | 0.022756 | 0.403257 |          |                 |          |
| Adrenaline 10nM     | 0.035226 | 0.002706 | 0.012973 | -0.01817 | -0.02039 | 0.043742 | 0.019091 | 0.020693 | -0.00712 | 0.012973 |          |          |          |          |          |          |          |          | <b>0.01017</b>  | 0.02122  | 0.317463 |          |                 |          |
| Adrenaline 1nM      | -0.01404 | 0.000192 | 0.021921 | -0.04184 | -0.03327 | -0.00215 | -0.02117 | 0.022942 | -0.01712 | -0.01919 |          |          |          |          |          |          |          |          | <b>-0.01037</b> | 0.021343 | 0.056738 |          |                 |          |
|                     | S006     | S010     | S011     | S012     | S013     | S014     | S018     | S020     | S022     | S023     | S025     | S027     | S028     | S030     | S033     | S038     | S039     | S040     | Ave.            | SD       | T-test   |          |                 |          |
| Isoproterenol 5mM   | 0.725266 | 0.568767 | 0.702749 | 0.629416 | 0.699681 | 0.640418 | 0.718965 | 0.628075 | 0.686357 | 0.588653 |          |          |          |          |          |          |          |          | <b>0.65883</b>  | 0.055349 | 0.307124 |          |                 |          |
| Isoproterenol 500uM | 0.637291 | 0.586099 | 0.835331 | 0.559633 | 0.635825 | 0.53767  | 0.661661 | 0.559142 | 0.695396 | 0.517951 |          |          |          |          |          |          |          |          | <b>0.6226</b>   | 0.094257 | 0.397501 |          |                 |          |
| Isoproterenol 50uM  | 0.341031 | 0.733721 | 0.769463 | 0.367988 | 0.386541 | 0.353047 | 0.492343 | 0.621584 | 0.732965 | 0.326346 | 0.420591 | 0.570836 | 0.438792 | 0.457682 | 0.632723 | 0.293867 | 0.196832 | 0.239483 | <b>0.46532</b>  | 0.174689 | 0.334851 |          |                 |          |
| Isoproterenol 5uM   | 0.265173 | 0.621524 | 0.738501 | 0.292338 | 0.294398 | 0.311931 | 0.451198 | 0.595527 | 0.652359 | 0.228663 | 0.340368 | 0.346525 | 0.266383 | 0.396637 | 0.544286 | 0.220749 | 0.145699 | 0.175552 | <b>0.38266</b>  | 0.177082 | 0.363184 |          |                 |          |
| Isoproterenol 500nM | 0.109187 | 0.296127 | 0.533742 | 0.179299 | 0.213354 | 0.188547 | 0.366337 | 0.48135  | 0.559745 | 0.143998 | 0.290534 | 0.063594 | 0.172424 | 0.259442 | 0.396763 | 0.168341 | 0.135114 | 0.16402  | <b>0.26233</b>  | 0.148597 | 0.361621 |          |                 |          |
| Isoproterenol 50nM  | -0.00523 | -0.02922 | 0.057122 | -0.04658 | 0.044483 | 0.050312 | 0.113573 | 0.090342 | 0.07349  | 0.035112 |          |          |          |          |          |          |          |          | <b>0.03834</b>  | 0.051444 | 0.378051 |          |                 |          |
| Isoproterenol 5nM   | -0.01767 | -0.0404  | -0.02934 | -0.02739 | -0.03118 | 0.011821 | 0.0196   | 0.061009 | -0.0191  | -0.03079 |          |          |          |          |          |          |          |          | <b>-0.01035</b> | 0.031653 | 0.448039 |          |                 |          |
