# Supplementary material for: Neurally mediated syncope diagnosis based on adenylate cyclase activity in Japanese patients
Source: PubMed Central journal article supplement (PMC6472876; doi:10.1371/journal.pone.0214733), 2019-04-18
Supplement: pone.0214733.s003.pdf [file pone.0214733.s003.pdf]

**S3 Table. The raw data of adenylate cyclase activities from 22 healthy volunteers and 11 VT patients at rest time by adrenaline (AD) and isoproterenol (IP).**

| NMS (VT) n=11    |         |          |          |          |          |           |          |          |          |          |          |                 |                 |                 |                 |  |  |  |
|------------------|---------|----------|----------|----------|----------|-----------|----------|----------|----------|----------|----------|-----------------|-----------------|-----------------|-----------------|--|--|--|
| Rest time        | S010    | S011     | S020     | S018     | S022     | S025      | S027     | S028     | S030     | S033     | S038     | Ave.            | SD              | T-test          |                 |  |  |  |
| Adrenaline 1mM   | 1000000 | 0.487138 | 0.750893 | 0.586864 | 0.701958 | 0.672472  |          |          |          |          |          | <b>0.639865</b> |                 |                 |                 |  |  |  |
| Adrenaline 100uM | 100000  | 0.684176 | 0.827716 | 0.60253  | 0.572592 | 0.748171  | 0.650868 | 0.567394 | 0.742349 | 0.653562 | 0.704688 | 0.431794        | <b>0.653258</b> | <b>0.107929</b> | <b>0.004697</b> |  |  |  |
| Adrenaline 10uM  | 10000   | 0.676036 | 0.696738 | 0.619195 | 0.462099 | 0.617245  | 0.380325 | 0.333458 | 0.29156  | 0.364902 | 0.546487 | 0.202504        | <b>0.471868</b> | <b>0.168761</b> | <b>0.031894</b> |  |  |  |
| Adrenaline 1uM   | 1000    | 0.2505   | 0.46025  | 0.355847 | 0.25945  | 0.452598  | 0.17769  | 0.07432  | 0.023519 | 0.250302 | 0.206664 | 0.11138         | <b>0.238411</b> | <b>0.14267</b>  | 0.150876        |  |  |  |
| Adrenaline 100nM | 100     | 0.014842 | 0.035339 | 0.071953 | 0.021223 | 0.0233457 |          |          |          |          |          |                 | <b>0.033363</b> |                 |                 |  |  |  |
| Adrenaline 10nM  | 10      | 0.002706 | 0.012973 | 0.020693 | 0.019091 | -0.00712  |          |          |          |          |          |                 | <b>0.009668</b> |                 |                 |  |  |  |
| Adrenaline 1nM   | 1       | 0.000192 | 0.021921 | 0.022942 | -0.02117 | -0.01712  |          |          |          |          |          |                 | <b>0.001353</b> |                 |                 |  |  |  |

  

| Healthy n=22     |         |          |          |          |          |          |          |          |          |          |          |          |          |          |          |          |          |          |          |          |          |          |          |                 |          |  |
|------------------|---------|----------|----------|----------|----------|----------|----------|----------|----------|----------|----------|----------|----------|----------|----------|----------|----------|----------|----------|----------|----------|----------|----------|-----------------|----------|--|
| Rest time        | c11     | c12      | c15      | c18      | c19-1    | c21      | c22      | c27      | C31      | C32      | C34      | C36-1    | C37-1    | C38-1    | C40-1    | C41-1    | C44      | C45      | C46-1    | C48      | C51      | C53      | Ave.     | SD              |          |  |
| Adrenaline 1mM   | 1000000 | 0.665778 | 0.709712 | 0.605874 | 0.679459 | 0.66414  | 0.648605 | 0.659015 | 0.627572 | 0.619857 | 0.598856 | 0.643871 | 0.521069 | 0.636478 | 0.680594 | 0.698643 | 0.653925 | 0.595107 | 0.618414 | 0.642209 | 0.560823 |          |          | <b>0.6365</b>   | 0.045584 |  |
| Adrenaline 100uM | 100000  | 0.382489 | 0.684619 | 0.517828 | 0.671012 | 0.483418 | 0.488458 | 0.535409 | 0.266942 | 0.689506 | 0.358322 | 0.529993 | 0.761974 | 0.473305 | 0.506677 | 0.504345 | 0.458885 | 0.500938 | 0.618381 | 0.585582 | 0.470625 | 0.61892  | 0.675834 | <b>0.535612</b> | 0.119677 |  |
| Adrenaline 10uM  | 10000   | 0.180688 | 0.493032 | 0.450436 | 0.620559 | 0.333002 | 0.222251 | 0.275791 | 0.114208 | 0.485896 | 0.247573 | 0.446659 | 0.648401 | 0.318276 | 0.261932 | 0.259273 | 0.111025 | 0.34603  | 0.394816 | 0.283347 | 0.371972 | 0.416767 | 0.504962 | <b>0.35395</b>  | 0.14584  |  |
| Adrenaline 1uM   | 1000    | 0.107534 | 0.320296 | 0.283733 | 0.474591 | 0.154205 | 0.096315 | 0.210773 | 0.091961 | 0.238154 | 0.078    | 0.264956 | 0.276602 | 0.127793 | 0.113756 | 0.127035 | 0.073354 | 0.170153 | 0.155721 | 0.139345 | 0.174706 | 0.209908 | 0.233382 | <b>0.187385</b> | 0.096448 |  |
| Adrenaline 100nM | 100     | 0.00513  | 0.032779 | 0.096791 | 0.072024 | -0.01772 | 0.045393 | 0.006167 | -0.0068  | 0.020975 | 0.043213 | 0.056215 | 0.004949 | 0.000302 | -0.00944 | 0.049311 | 0.044332 | 0.020905 | -0.00616 | 0.014158 | 0.027011 |          |          | <b>0.024977</b> | 0.029931 |  |
| Adrenaline 10nM  | 10      | 0.000772 | 0.038757 | 0.064506 | 0.007085 | -0.00368 | 0.001048 | 0.027036 | 0.006591 | -0.02026 | 0.019966 | 0.033297 | -0.01609 | -0.00296 | 0.035078 | 0.047313 | 0.020914 | 0.004542 | -0.01043 | 0.003003 | 0.027658 |          |          | <b>0.014208</b> | 0.022315 |  |
| Adrenaline 1nM   | 1       | 0.019697 | -0.00545 | 0.036996 | -1.2E-05 | 0.030544 | -0.00934 | 0.036254 | -0.00643 | -0.02535 | 0.009534 | 0.027782 | -0.03253 | -0.01143 | 0.011143 | 0.010164 | 0.008347 | -0.00524 | -0.02445 | 0.006562 | -0.01318 |          |          | <b>0.00318</b>  | 0.020253 |  |

  

| NMS (VT) n=11       |         |          |          |          |          |          |          |          |          |          |          |                 |                 |                 |                 |  |  |  |
|---------------------|---------|----------|----------|----------|----------|----------|----------|----------|----------|----------|----------|-----------------|-----------------|-----------------|-----------------|--|--|--|
| Rest time           | S010    | S011     | S020     | S018     | S022     | S025     | S027     | S028     | S030     | S033     | S038     | Ave.            | SD              | T-test          |                 |  |  |  |
| Isoproterenol 5mM   | 5000000 | 0.568767 | 0.702749 | 0.628075 | 0.718965 | 0.686357 |          |          |          |          |          | <b>0.660983</b> |                 |                 |                 |  |  |  |
| Isoproterenol 500uM | 500000  | 0.586099 | 0.835331 | 0.559142 | 0.661661 | 0.695396 |          |          |          |          |          | <b>0.667526</b> |                 |                 |                 |  |  |  |
| Isoproterenol 50uM  | 50000   | 0.733721 | 0.769463 | 0.621584 | 0.492343 | 0.732965 | 0.420591 | 0.570836 | 0.438792 | 0.457682 | 0.632723 | 0.293867        | <b>0.560415</b> | <b>0.152698</b> | <b>0.023311</b> |  |  |  |
| Isoproterenol 5uM   | 5000    | 0.621524 | 0.738501 | 0.595527 | 0.451198 | 0.652359 | 0.340368 | 0.346525 | 0.266383 | 0.396637 | 0.544286 | 0.220749        | <b>0.470369</b> | <b>0.170573</b> | 0.048316        |  |  |  |
| Isoproterenol 500nM | 500     | 0.296127 | 0.533742 | 0.48135  | 0.366337 | 0.559745 | 0.290534 | 0.063594 | 0.172424 | 0.259442 | 0.396763 | 0.168341        | <b>0.326218</b> | <b>0.158884</b> | 0.079686        |  |  |  |
| Isoproterenol 50nM  | 50      | -0.02922 | 0.057122 | 0.090342 | 0.113573 | 0.073349 |          |          |          |          |          |                 | <b>0.061062</b> |                 |                 |  |  |  |
| Isoproterenol 5nM   | 5       | -0.0404  | -0.02934 | 0.061009 | 0.0196   | -0.0191  |          |          |          |          |          |                 | <b>-0.00165</b> |                 |                 |  |  |  |

  

| Healthy n=22        |         |          |          |          |          |          |          |          |          |          |          |          |          |          |          |          |          |          |          |          |          |          |          |                 |          |  |
|---------------------|---------|----------|----------|----------|----------|----------|----------|----------|----------|----------|----------|----------|----------|----------|----------|----------|----------|----------|----------|----------|----------|----------|----------|-----------------|----------|--|
| Rest time           | c11     | c12      | c15      | c18      | c19-1    | c21      | c22      | c27      | C31      | C32      | C34      | C36-1    | C37-1    | C38-1    | C40-1    | C41-1    | C44      | C45      | C46-1    | C48      | C51      | C53      | Ave.     | SD              |          |  |
| Isoproterenol 5mM   | 5000000 | 0.669095 | 0.703023 | 0.623355 | 0.690352 | 0.673022 | 0.699203 | 0.708399 | 0.675712 | 0.69715  | 0.710542 | 0.703129 | 0.575502 | 0.66463  | 0.695884 | 0.692927 | 0.678168 | 0.611632 | 0.652262 | 0.66928  | 0.586175 |          |          | <b>0.67333</b>  | 0.035948 |  |
| Isoproterenol 500uM | 500000  | 0.608009 | 0.757064 | 0.566149 | 0.687068 | 0.681287 | 0.630683 | 0.681743 | 0.517073 | 0.69555  | 0.681416 | 0.736972 | 0.685033 | 0.545955 | 0.627609 | 0.598349 | 0.549981 | 0.537974 | 0.685699 | 0.621838 | 0.53584  |          |          | <b>0.636603</b> | 0.070205 |  |
| Isoproterenol 50uM  | 50000   | 0.288006 | 0.546953 | 0.487765 | 0.651297 | 0.468436 | 0.3163   | 0.428554 | 0.180695 | 0.616843 | 0.362266 | 0.492994 | 0.765834 | 0.441879 | 0.351528 | 0.339658 | 0.216537 | 0.430339 | 0.513744 | 0.363962 | 0.444081 | 0.45709  | 0.590449 | <b>0.443419</b> | 0.140251 |  |
| Isoproterenol 5uM   | 5000    | 0.188182 | 0.496038 | 0.440036 | 0.658714 | 0.327386 | 0.204281 | 0.262864 | 0.12156  | 0.490538 | 0.277363 | 0.4665   | 0.640779 | 0.356776 | 0.255737 | 0.26817  | 0.113567 | 0.362864 | 0.43042  | 0.274708 | 0.409016 | 0.436873 | 0.527037 | <b>0.364064</b> | 0.150783 |  |
| Isoproterenol 500nM | 500     | 0.123776 | 0.362219 | 0.331471 | 0.52107  | 0.203149 | 0.135653 | 0.22689  | 0.093842 | 0.329655 | 0.167712 | 0.343476 | 0.358901 | 0.149965 | 0.193664 | 0.172408 | 0.10231  | 0.212486 | 0.276707 | 0.196201 | 0.247488 | 0.295521 | 0.395715 | <b>0.247285</b> | 0.109484 |  |
| Isoproterenol 50nM  | 50      | 0.037773 | 0.07921  | 0.117023 | 0.071785 | -0.02106 | 0.045873 | 0.008457 | 0.01532  | 0.021355 | 0.018697 | 0.050615 | -0.00447 | -0.03872 | 0.05684  | 0.102597 | 0.030603 | -0.00243 | 0.001456 | 0.010148 | 0.04824  |          |          | <b>0.031635</b> | 0.040878 |  |
| Isoproterenol 5nM   | 5       | 0.010342 | 0.007737 | 0.026485 | 0.008271 | -0.0284  | 0.023353 | -0.01194 | -0.02223 | -0.01318 | -0.04152 | -0.00162 | -0.02807 | -0.02625 | -0.04086 | -0.00476 | 0.021786 | -0.0364  | -0.05255 | -0.00086 | -0.02629 |          |          | <b>-0.01109</b> | 0.023829 |  |
