# Supplementary material for: Neurally mediated syncope diagnosis based on adenylate cyclase activity in Japanese patients
Source: PubMed Central journal article supplement (PMC6472876; doi:10.1371/journal.pone.0214733), 2019-04-18
Supplement: pone.0214733.s005.pdf [file pone.0214733.s005.pdf]

**S5 Table. The raw data of adenylate cyclase activities from 12 healthy volunteers and 11 VT patients at HUT test by adrenaline (AD) and isoproterenol (IP).**

| NMS (VT) n=11       | 1       | 2        | 3        | 4        | 5        | 6        | 7        | 8        | 9        | 10       | 11       | Average         | SD              |                 |
|---------------------|---------|----------|----------|----------|----------|----------|----------|----------|----------|----------|----------|-----------------|-----------------|-----------------|
| Base                | S010-1  | S011-1   | S020-1   | S018-1   | S022-1   | S025-1   | S027-1   | S028-1   | S030-1   | S033-1   | S038-1   |                 |                 |                 |
| Isoproterenol 5mM   | 5000000 | 0.568767 | 0.702749 | 0.628075 | 0.718965 | 0.686357 |          |          |          |          |          | <b>0.660983</b> |                 |                 |
| Isoproterenol 500uM | 500000  | 0.586099 | 0.835331 | 0.559142 | 0.661661 | 0.695396 |          |          |          |          |          | <b>0.667526</b> |                 |                 |
| Isoproterenol 50uM  | 50000   | 0.733721 | 0.769463 | 0.621584 | 0.492343 | 0.732965 | 0.420591 | 0.570836 | 0.438792 | 0.457682 | 0.632723 | 0.293867        | <b>0.560415</b> | <b>0.152698</b> |
| Isoproterenol 5uM   | 5000    | 0.621524 | 0.738501 | 0.595527 | 0.451198 | 0.652359 | 0.340368 | 0.346525 | 0.266383 | 0.396637 | 0.544286 | 0.220749        | <b>0.470369</b> | <b>0.170573</b> |
| Isoproterenol 500nM | 500     | 0.296127 | 0.533742 | 0.48135  | 0.366337 | 0.559745 | 0.290534 | 0.063594 | 0.172424 | 0.259442 | 0.396763 | 0.168341        | <b>0.326218</b> | <b>0.158884</b> |
| Isoproterenol 50nM  | 50      | -0.02922 | 0.057122 | 0.090342 | 0.113573 | 0.07349  |          |          |          |          |          |                 | <b>0.061062</b> |                 |
| Isoproterenol 5nM   | 5       | -0.0404  | -0.02934 | 0.061009 | 0.0196   | -0.0191  |          |          |          |          |          |                 | <b>-0.00165</b> |                 |
| Adrenaline 1mM      | 1000000 | 0.487138 | 0.750893 | 0.586864 | 0.701958 | 0.672472 |          |          |          |          |          |                 | <b>0.639865</b> |                 |
| Adrenaline 100uM    | 100000  | 0.684176 | 0.827716 | 0.62053  | 0.572592 | 0.748171 | 0.650868 | 0.567394 | 0.742349 | 0.653562 | 0.704688 | 0.431794        | <b>0.652328</b> | <b>0.107929</b> |
| Adrenaline 10uM     | 10000   | 0.676036 | 0.696738 | 0.619195 | 0.462099 | 0.617245 | 0.380325 | 0.333458 | 0.29156  | 0.364902 | 0.546487 | 0.202504        | <b>0.471868</b> | <b>0.168761</b> |
| Adrenaline 1uM      | 1000    | 0.2505   | 0.46025  | 0.355847 | 0.25945  | 0.452598 | 0.17769  | 0.07432  | 0.023519 | 0.250302 | 0.206664 | 0.11138         | <b>0.238411</b> | <b>0.14267</b>  |
| Adrenaline 100nM    | 100     | 0.014842 | 0.035339 | 0.071953 | 0.021223 | 0.023457 |          |          |          |          |          |                 | <b>0.033363</b> |                 |
| Adrenaline 10nM     | 10      | 0.002706 | 0.012973 | 0.020693 | 0.019091 | -0.00712 |          |          |          |          |          |                 | <b>0.009668</b> |                 |
| Adrenaline 1nM      | 1       | 0.000192 | 0.021921 | 0.022942 | -0.02117 | -0.01712 |          |          |          |          |          |                 | <b>0.001353</b> |                 |
| 70"                 | S010-2  | S011-2   | S020-2   | S018-2   | S022-2   | S025-2   | S027-2   | S028-2   | S030-2   | S033-2   | S038-2   |                 |                 |                 |
| Isoproterenol 5mM   | 5000000 | 0.567395 | 0.681576 | 0.61814  | 0.682051 | 0.666079 |          |          |          |          |          | <b>0.643048</b> |                 |                 |
| Isoproterenol 500uM | 500000  | 0.596599 | 0.777989 | 0.531318 | 0.689018 | 0.758639 |          |          |          |          |          | <b>0.670713</b> |                 |                 |
| Isoproterenol 50uM  | 50000   | 0.679497 | 0.727236 | 0.59271  | 0.527635 | 0.698648 | 0.384592 | 0.475822 | 0.492902 | 0.37946  | 0.536518 | 0.249628        | <b>0.522241</b> | <b>0.148235</b> |
| Isoproterenol 5uM   | 5000    | 0.614095 | 0.645358 | 0.541985 | 0.540967 | 0.607188 | 0.324837 | 0.294697 | 0.26714  | 0.344974 | 0.472921 | 0.196118        | <b>0.435144</b> | <b>0.156784</b> |
| Isoproterenol 500nM | 500     | 0.316829 | 0.522743 | 0.396833 | 0.399744 | 0.557719 | 0.235201 | 0.036007 | 0.132435 | 0.254846 | 0.272694 | 0.16503         | <b>0.299075</b> | <b>0.160797</b> |
| Isoproterenol 50nM  | 50      | 0.002822 | 0.05555  | 0.103269 | 0.148853 | 0.079493 |          |          |          |          |          |                 | <b>0.077487</b> |                 |
| Isoproterenol 5nM   | 5       | -0.01483 | 0.015978 | -0.0062  | 0.02235  | -0.04951 |          |          |          |          |          |                 | <b>-0.00644</b> |                 |
| Adrenaline 1mM      | 1000000 | 0.519159 | 0.687653 | 0.585581 | 0.618387 | 0.68096  |          |          |          |          |          |                 | <b>0.618348</b> |                 |
| Adrenaline 100uM    | 100000  | 0.645164 | 0.773556 | 0.554981 | 0.616481 | 0.742601 | 0.614422 | 0.516414 | 0.720865 | 0.518816 | 0.66297  | 0.43818         | <b>0.618596</b> | <b>0.104676</b> |
| Adrenaline 10uM     | 10000   | 0.657167 | 0.62745  | 0.500829 | 0.44446  | 0.585747 | 0.329431 | 0.286579 | 0.318732 | 0.334241 | 0.44186  | 0.199594        | <b>0.430308</b> | <b>0.15054</b>  |
| Adrenaline 1uM      | 1000    | 0.260674 | 0.387023 | 0.271924 | 0.267841 | 0.405729 | 0.139165 | 0.033594 | 0.055666 | 0.121953 | 0.091769 | 0.07886         | <b>0.192191</b> | <b>0.13222</b>  |
| Adrenaline 100nM    | 100     | 0.003545 | 0.077247 | 0.050537 | 0.05242  | 0.008616 |          |          |          |          |          |                 | <b>0.037833</b> |                 |
| Adrenaline 10nM     | 10      | -0.00232 | 0.028567 | 0.021912 | -0.0108  | -0.01898 |          |          |          |          |          |                 | <b>0.003695</b> |                 |
| Adrenaline 1nM      | 1       | 0.004926 | 0.026981 | -0.00411 | -0.05271 | -0.02387 |          |          |          |          |          |                 | <b>-0.00976</b> |                 |
| 10 min              | S010-3  | S011-3   | S020-3   | S018-3   | S022-3   | S025-3   | S027-3   | S028-3   | S030-3   | S033-3   | S038-3   |                 |                 |                 |
| Isoproterenol 5mM   | 5000000 | 0.504606 | 0.640308 | 0.622595 | 0.642863 | 0.61086  |          |          |          |          |          | <b>0.604247</b> |                 |                 |
| Isoproterenol 500uM | 500000  | 0.51933  | 0.758241 | 0.515928 | 0.79548  | 0.574282 |          |          |          |          |          | <b>0.632652</b> |                 |                 |
| Isoproterenol 50uM  | 50000   | 0.743942 | 0.851982 | 0.74846  | 0.691033 | 0.720393 | 0.442187 | 0.48591  | 0.538029 | 0.370512 | 0.580232 | 0.277888        | <b>0.586415</b> | <b>0.180438</b> |
| Isoproterenol 5uM   | 5000    | 0.719171 | 0.786167 | 0.711526 | 0.649533 | 0.647722 | 0.355551 | 0.347945 | 0.3955   | 0.242978 | 0.51458  | 0.218619        | <b>0.508118</b> | <b>0.204569</b> |
| Isoproterenol 500nM | 500     | 0.394464 | 0.624263 | 0.539591 | 0.501392 | 0.4531   | 0.246001 | 0.064996 | 0.276522 | 0.081793 | 0.337905 | 0.161485        | <b>0.334683</b> | <b>0.188661</b> |
| Isoproterenol 50nM  | 50      | 0.030549 | 0.121082 | 0.027205 | 0.080389 | 0.022713 |          |          |          |          |          |                 | <b>0.056388</b> |                 |
| Isoproterenol 5nM   | 5       | -0.00318 | 0.076558 | -0.03857 | -0.03343 | -0.01341 |          |          |          |          |          |                 | <b>-0.00241</b> |                 |
| Adrenaline 1mM      | 1000000 | 0.50789  | 0.677842 | 0.594521 | 0.575614 | 0.616314 |          |          |          |          |          |                 | <b>0.594436</b> |                 |
| Adrenaline 100uM    | 100000  | 0.692489 | 0.85246  | 0.513948 | 0.760478 | 0.670876 | 0.666506 | 0.501271 | 0.789848 | 0.657763 | 0.697239 | 1.201654        | <b>0.727685</b> | <b>0.188713</b> |
| Adrenaline 10uM     | 10000   | 0.678469 | 0.75921  | 0.619409 | 0.648548 | 0.645979 | 0.378521 | 0.340734 | 0.419322 | 0.289854 | 0.469217 | 0.80867         | <b>0.557267</b> | <b>0.181659</b> |
| Adrenaline 1uM      | 1000    | 0.378033 | 0.559693 | 0.38548  | 0.341349 | 0.365023 | 0.138492 | 0.029099 | 0.149118 | -0.00617 | 0.17563  | 0.302689        | <b>0.256221</b> | <b>0.17238</b>  |
| Adrenaline 100nM    | 100     | 0.003833 | 0.123474 | 0.014661 | 0.00831  | 0.008865 |          |          |          |          |          |                 | <b>0.031829</b> |                 |
| Adrenaline 10nM     | 10      | -0.01047 | 0.099127 | -0.00081 | -0.03207 | -0.02395 |          |          |          |          |          |                 | <b>0.006365</b> |                 |
| Adrenaline 1nM      | 1       | -0.03997 | 0.06751  | -0.00233 | -0.04748 | -0.03276 |          |          |          |          |          |                 | <b>-0.01701</b> |                 |
| 20 min              | S010-4  | S011-4   | S020-4   | S018-4   | S022-4   | S025-4   | S027-4   | S028-4   | S030-4   | S033-4   | S038-4   |                 |                 |                 |
| Isoproterenol 5mM   | 5000000 | 0.496711 | 0.615417 | 0.609225 | 0.641134 | 0.650141 |          |          |          |          |          | <b>0.602531</b> |                 |                 |
| Isoproterenol 500uM | 500000  | 0.483746 | 0.714936 | 0.474665 | 0.725084 | 0.570216 |          |          |          |          |          | <b>0.594089</b> |                 |                 |
| Isoproterenol 50uM  | 50000   | 0.726675 | 0.851575 | 0.467004 | 0.564148 | 0.583106 | 0.555561 | 0.46789  | 0.943602 | 0.425595 | 0.798589 | 0.383465        | <b>0.615201</b> | <b>0.187159</b> |
| Isoproterenol 5uM   | 5000    | 0.663717 | 0.787797 | 0.635865 | 0.526052 | 0.528271 | 0.42243  | 0.305321 | 0.823986 | 0.237546 | 0.740131 | 0.3006          | <b>0.542883</b> | <b>0.206041</b> |
| Isoproterenol 500nM | 500     | 0.348455 | 0.570592 | 0.104036 | 0.363326 | 0.341548 | 0.298335 | 0.076658 | 0.605585 | 0.123164 | 0.395797 | 0.232739        | <b>0.314534</b> | <b>0.174834</b> |
| Isoproterenol 50nM  | 50      | 0.023837 | 0.010731 | -0.04001 | 0.016022 | -0.01069 |          |          |          |          |          |                 | <b>-2.3E-05</b> |                 |
| Isoproterenol 5nM   | 5       | -0.00582 | -0.0156  | -0.05977 | -0.05355 | -0.0474  |          |          |          |          |          |                 | <b>-0.03643</b> |                 |
| Adrenaline 1mM      | 1000000 | 0.516423 | 0.684465 | 0.570804 | 0.656563 | 0.671085 |          |          |          |          |          |                 | <b>0.601681</b> |                 |
| Adrenaline 100uM    | 100000  | 0.657282 | 0.862138 | 0.425849 | 0.652369 | 0.558295 | 0.675027 | 0.507124 | 1.034919 | 0.624778 | 0.869849 | 0.496692        | <b>0.669466</b> | <b>0.184746</b> |
| Adrenaline 10uM     | 10000   | 0.670621 | 0.79486  | 0.657951 | 0.497933 | 0.536603 | 0.369575 | 0.31338  | 0.847719 | 0.286675 | 0.698028 | 0.3166          | <b>0.543377</b> | <b>0.20292</b>  |
| Adrenaline 1uM      | 1000    | 0.37494  | 0.612562 | 0.204264 | 0.245087 | 0.312681 | 0.11157  | 0.039975 | 0.304423 | 0.069236 | 0.239623 | 0.163045        | <b>0.244301</b> | <b>0.160999</b> |
| Adrenaline 100nM    | 100     | 0.041646 | 0.135315 | -0.01526 | 0.021547 | 0.05079  |          |          |          |          |          |                 | <b>0.047665</b> |                 |
| Adrenaline 10nM     | 10      | 0.04105  | 0.069168 | -0.03001 | 0.007554 | 0.026889 |          |          |          |          |          |                 | <b>0.022931</b> |                 |
| Adrenaline 1nM      | 1       | 0.041774 | 0.028757 | 0.013725 | 0.003925 | 0.005555 |          |          |          |          |          |                 | <b>0.018747</b> |                 |

| Healthy n=12        | 1       | 2        | 3        | 4        | 5        | 6        | 7        | 8        | 9        | 10       | 11       | 12       | Average         | SD              | T-test          |                 |
|---------------------|---------|----------|----------|----------|----------|----------|----------|----------|----------|----------|----------|----------|-----------------|-----------------|-----------------|-----------------|
| Base                | C36-1   | C37-1    | C38-1    | C40-1    | C41-1    | C43-1    | C46-1    | C47-1    | C48-1    | C050-1   | C051-1   | C053-1   |                 |                 |                 |                 |
| Isoproterenol 5mM   | 5000000 | 0.575502 | 0.66463  | 0.695884 | 0.692927 | 0.678168 | 0.616207 | 0.66928  | 0.626701 | 0.586175 | 0        | 0        | <b>0.633191</b> |                 |                 |                 |
| Isoproterenol 500uM | 500000  | 0.685033 | 0.549955 | 0.627609 | 0.598349 | 0.549981 | 0.486665 | 0.621838 | 0.556789 | 0.53584  | 0        | 0        | <b>0.571728</b> |                 |                 |                 |
| Isoproterenol 50uM  | 50000   | 0.765834 | 0.441879 | 0.351528 | 0.339658 | 0.216537 | 0.378901 | 0.363962 | 0.275046 | 0.444081 | 0.232386 | 0.45709  | 0.590449        | <b>0.404779</b> | <b>0.154299</b> | <b>0.01212</b>  |
| Isoproterenol 5uM   | 5000    | 0.640779 | 0.356776 | 0.255737 | 0.26817  | 0.113567 | 0.353159 | 0.274708 | 0.20157  | 0.409016 | 0.125952 | 0.436873 | 0.527037        | <b>0.330279</b> | <b>0.15716</b>  | <b>0.027111</b> |
| Isoproterenol 500nM | 500     | 0.358901 | 0.149965 | 0.193664 | 0.172408 | 0.10231  | 0.261852 | 0.196201 | 0.160736 | 0.247488 | 0.140866 | 0.295521 | 0.395715        | <b>0.222969</b> | <b>0.09061</b>  |                 |
