# Supplementary material for: Neurally mediated syncope diagnosis based on adenylate cyclase activity in Japanese patients
Source: PubMed Central journal article supplement (PMC6472876; doi:10.1371/journal.pone.0214733), 2019-04-18
Supplement: pone.0214733.s006.pdf [file pone.0214733.s006.pdf]

S6 Table. The raw data of adenylate cyclase activities from 12 healthy volunteers and 6 MT patients at HUT test by adrenaline (AD) and isoproterenol (IP).

| NMS n=6             |         |          |          |          |          |          |          |                 |                 | Healthy n=12 |                     |         |          |          |          |          |          |          |          |          |          |          |          |          |                 |                 |                 |
|---------------------|---------|----------|----------|----------|----------|----------|----------|-----------------|-----------------|--------------|---------------------|---------|----------|----------|----------|----------|----------|----------|----------|----------|----------|----------|----------|----------|-----------------|-----------------|-----------------|
| Base                | 1       | 2        | 3        | 4        | 5        | 6        | Ave.     | SD              |                 |              | Base                | 1       | 2        | 3        | 4        | 5        | 6        | 7        | 8        | 9        | 10       | 11       | 12       | Average  | SD              | T-test          |                 |
| Isoproterenol 5mM   | 500000  | 0.629416 | 0.699681 | 0.640418 | 0.582631 | 0.5039-1 | 0.5040-2 | <b>0.639542</b> | <b>0.045861</b> |              | Isoproterenol 5mM   | 500000  | 0.575502 | 0.66463  | 0.695884 | 0.692927 | 0.678168 | 0.616207 | 0.66928  | 0.626701 | 0.586175 | 0        | 0        | 0        | 0               | 0               | <b>0.52777</b>  |
| Isoproterenol 500uM | 500000  | 0.559633 | 0.635825 | 0.53767  | 0.517951 |          |          | <b>0.562769</b> | <b>0.015193</b> |              | Isoproterenol 500uM | 500000  | 0.685033 | 0.545955 | 0.627609 | 0.598349 | 0.549981 | 0.486665 | 0.621838 | 0.556789 | 0.53584  | 0        | 0        | 0        | 0               | 0               | <b>0.47346</b>  |
| Isoproterenol 50uM  | 50000   | 0.367988 | 0.386541 | 0.353047 | 0.326346 | 0.196832 | 0.239483 | <b>0.311706</b> | <b>0.076239</b> |              | Isoproterenol 50uM  | 50000   | 0.765834 | 0.441879 | 0.351528 | 0.339658 | 0.216537 | 0.378901 | 0.363962 | 0.275046 | 0.444081 | 0.232386 | 0.45709  | 0.590449 | 0.404779        | 0.154299        | <b>0.053075</b> |
| Isoproterenol 5uM   | 5000    | 0.292338 | 0.294398 | 0.311931 | 0.228663 | 0.145699 | 0.175552 | <b>0.24143</b>  | <b>0.069333</b> |              | Isoproterenol 5uM   | 5000    | 0.640779 | 0.356776 | 0.255737 | 0.26817  | 0.113567 | 0.353159 | 0.274708 | 0.20157  | 0.409016 | 0.125952 | 0.436873 | 0.527037 | <b>0.330279</b> | <b>0.15716</b>  | <b>0.058083</b> |
| Isoproterenol 500nM | 500     | 0.179299 | 0.213354 | 0.188547 | 0.143998 | 0.135114 | 0.16402  | <b>0.170722</b> | <b>0.029106</b> |              | Isoproterenol 500nM | 500     | 0.358901 | 0.149965 | 0.193664 | 0.172408 | 0.10231  | 0.261852 | 0.196201 | 0.160736 | 0.247488 | 0.140866 | 0.295521 | 0.395715 | <b>0.222969</b> | <b>0.090619</b> | <b>0.044758</b> |
| Isoproterenol 50nM  | 50      | -0.04658 | 0.044483 | 0.050312 | 0.035112 |          |          | <b>0.020831</b> | <b>0.045377</b> |              | Isoproterenol 50nM  | 50      | -0.00447 | -0.03872 | 0.05684  | 0.102597 | 0.030603 | 0.050547 | 0.101048 | 0.041667 | 0.04824  | 0        | 0        | 0        | 0               | <b>0.027041</b> |                 |
| Isoproterenol 5nM   | 5       | -0.02739 | -0.03118 | 0.011821 | -0.03079 |          |          | <b>-0.01939</b> | <b>0.020875</b> |              | Isoproterenol 5nM   | 5       | -0.02807 | -0.02625 | -0.04086 | -0.00476 | 0.021786 | -0.00598 | -0.00086 | 0.004312 | -0.02629 | 0        | 0        | 0        | 0               | <b>-0.00972</b> |                 |
| Adrenaline 1mM      | 1000000 | 0.602188 | 0.703524 | 0.609078 | 0.547432 |          |          | <b>0.615555</b> | <b>0.064807</b> |              | Adrenaline 1mM      | 1000000 | 0.521069 | 0.636478 | 0.680594 | 0.698643 | 0.653925 | 0.615496 | 0.642209 | 0.57025  | 0.560823 | 0        | 0        | 0        | 0               | <b>0.507226</b> |                 |
| Adrenaline 100uM    | 100000  | 0.477584 | 0.546374 | 0.459416 | 0.425863 | 0.553276 | 0.498887 | <b>0.493567</b> | <b>0.049775</b> |              | Adrenaline 100uM    | 100000  | 0.761974 | 0.473305 | 0.506677 | 0.504345 | 0.458885 | 0.484882 | 0.585582 | 0.488452 | 0.470625 | 0.464659 | 0.61892  | 0.675834 | <b>0.541178</b> | <b>0.097983</b> | <b>0.095287</b> |
| Adrenaline 10uM     | 10000   | 0.251743 | 0.307234 | 0.294726 | 0.206934 | 0.184153 | 0.262383 | <b>0.251196</b> | <b>0.048196</b> |              | Adrenaline 10uM     | 10000   | 0.648401 | 0.318276 | 0.261932 | 0.259273 | 0.111025 | 0.379446 | 0.283347 | 0.204512 | 0.371972 | 0.163163 | 0.416767 | 0.504962 | <b>0.326923</b> | <b>0.149877</b> | <b>0.066226</b> |
| Adrenaline 1uM      | 1000    | 0.119948 | 0.161568 | 0.172037 | 0.098696 | 0.047194 | 0.063337 | <b>0.110463</b> | <b>0.057076</b> |              | Adrenaline 1uM      | 1000    | 0.276602 | 0.127793 | 0.113756 | 0.127035 | 0.07354  | 0.359127 | 0.139345 | 0.097657 | 0.174706 | 0.0945   | 0.209908 | 0.233382 | <b>0.168946</b> | <b>0.085663</b> | <b>0.044716</b> |
| Adrenaline 100nM    | 100     | -0.0088  | 0.009609 | 0.041574 | 0.013837 |          |          | <b>0.014056</b> | <b>0.020811</b> |              | Adrenaline 100nM    | 100     | 0.004949 | 0.000302 | -0.00944 | 0.049311 | 0.044332 | 0.265821 | 0.014158 | 0.017002 | 0.027011 | 0        | 0        | 0        | 0               | <b>0.037586</b> |                 |
| Adrenaline 10nM     | 10      | -0.01817 | -0.02039 | 0.043742 | 0.012973 |          |          | <b>0.004538</b> | <b>0.03025</b>  |              | Adrenaline 10nM     | 10      | -0.01609 | -0.00296 | 0.035078 | 0.047313 | 0.020914 | 0.051841 | 0.003003 | 0.005244 | 0.027658 | 0        | 0        | 0        | 0               | <b>0.015636</b> |                 |
| Adrenaline 1nM      | 1       | -0.04184 | -0.03327 | -0.00215 | -0.01919 |          |          | <b>-0.02411</b> | <b>0.017366</b> |              | Adrenaline 1nM      | 1       | -0.03253 | -0.01143 | 0.011143 | 0.010164 | 0.008347 | -0.01477 | 0.006562 | -0.01425 | -0.01318 | 0        | 0        | 0        | 0               | <b>-0.00454</b> |                 |
| 70°                 |         |          |          |          |          |          |          |                 |                 | 70°          |                     |         |          |          |          |          |          |          |          |          |          |          |          |          |                 |                 |                 |
| Base                | 1       | 2        | 3        | 4        | 5        | 6        | Ave.     | SD              |                 |              | Base                | 1       | 2        | 3        | 4        | 5        | 6        | 7        | 8        | 9        | 10       | 11       | 12       | Average  | SD              | T-test          |                 |
| Isoproterenol 5mM   | 5000000 | 0.635191 | 0.700735 | 0.631188 | 0.58767  |          |          | <b>0.638606</b> | <b>0.046464</b> |              | Isoproterenol 5mM   | 5000000 | 0.540608 | 0.610219 | 0.701339 | 0.675345 | 0.65798  | 0.585305 | 0.641233 | 0.6516   | 0.580769 | 0        | 0        | 0        | 0               | 0               | <b>0.513102</b> |
| Isoproterenol 500uM | 500000  | 0.589408 | 0.64624  | 0.519012 | 0.552729 |          |          | <b>0.576847</b> | <b>0.045466</b> |              | Isoproterenol 500uM | 500000  | 0.609467 | 0.501615 | 0.604967 | 0.628939 | 0.519893 | 0.436723 | 0.532393 | 0.677576 | 0.497326 | 0        | 0        | 0        | 0               | <b>0.46081</b>  |                 |
| Isoproterenol 50uM  | 50000   | 0.390474 | 0.382622 | 0.311407 | 0.317287 | 0.156795 | 0.223733 | <b>0.297053</b> | <b>0.091338</b> |              | Isoproterenol 50uM  | 50000   | 0.701006 | -0.38992 | 0.277178 | 0.370136 | 0.164946 | 0.357192 | 0.276163 | 0.412235 | 0.384919 | 0.162713 | 0.457463 | 0.590068 | <b>0.378662</b> | <b>0.156597</b> | <b>0.091763</b> |
| Isoproterenol 5uM   | 5000    | 0.312679 | 0.272516 | 0.257444 | 0.231851 | 0.073495 | 0.156341 | <b>0.217388</b> | <b>0.087596</b> |              | Isoproterenol 5uM   | 5000    | 0.605642 | 0.309221 | 0.199197 | 0.299357 | 0.111925 | 0.257048 | 0.161475 | 0.292475 | 0.298717 | 0.128747 | 0.460466 | 0.531201 | <b>0.304623</b> | <b>0.156206</b> | <b>0.074785</b> |
| Isoproterenol 500nM | 500     | 0.215852 | 0.177094 | 0.136247 | 0.170848 | 0.084296 | 0.147212 | <b>0.155288</b> | <b>0.044392</b> |              | Isoproterenol 500nM | 500     | 0.356867 | 0.145321 | 0.167315 | 0.232847 | 0.054602 | 0.169873 | 0.088058 | 0.200724 | 0.205905 | 0.108746 | 0.302144 | 0.388832 | <b>0.201769</b> | <b>0.103897</b> | <b>0.017609</b> |
| Isoproterenol 50nM  | 50      | 0.010102 | 0.024513 | -0.01777 | 0.056167 |          |          | <b>0.018115</b> | <b>0.030548</b> |              | Isoproterenol 50nM  | 50      | 0.013634 | -0.01311 | 0.10221  | 0.124296 | 0.026071 | -0.06476 | -0.02964 | 0.061021 | 0.072152 | 0        | 0        | 0        | 0               | <b>0.026534</b> |                 |
| Isoproterenol 5nM   | 5       | -0.03631 | -0.0225  | -0.0124  | 0.030218 |          |          | <b>-0.01025</b> | <b>0.028703</b> |              | Isoproterenol 5nM   | 5       | -0.01947 | -0.02522 | 0.020029 | 0.036247 | -0.00439 | -0.14128 | -0.04897 | 0.014085 | -0.00481 | 0        | 0        | 0        | 0               | <b>-0.0158</b>  |                 |
| Adrenaline 1mM      | 1000000 | 0.618843 | 0.710809 | 0.584996 | 0.562071 |          |          | <b>0.61918</b>  | <b>0.065386</b> |              | Adrenaline 1mM      | 1000000 | 0.495798 | 0.569605 | 0.704251 | 0.678227 | 0.631304 | 0.532862 | 0.604557 | 0.585728 | 0.53985  | 0        | 0        | 0        | 0               | <b>0.485653</b> |                 |
| Adrenaline 100uM    | 100000  | 0.48837  | 0.529095 | 0.407421 | 0.434569 | 0.408176 | 0.452572 | <b>0.453367</b> | <b>0.04789</b>  |              | Adrenaline 100uM    | 100000  | 0.705793 | 0.417502 | 0.453322 | 0.256434 | 0.412419 | 0.357069 | 0.460932 | 0.634343 | 0.413427 | 0.418743 | 0.579005 | 0.68229  | <b>0.50587</b>  | <b>0.118856</b> | <b>0.101355</b> |
| Adrenaline 10uM     | 10000   | 0.289032 | 0.283581 | 0.241425 | 0.229432 | 0.108052 | 0.177597 | <b>0.212152</b> | <b>0.068808</b> |              | Adrenaline 10uM     | 10000   | 0.617504 | 0.281772 | 0.188715 | 0.265434 | 0.104945 | 0.232808 | 0.176941 | 0.309194 | 0.295352 | 0.143949 | 0.37588  | 0.465157 | <b>0.287633</b> | <b>0.143551</b> | <b>0.102607</b> |
| Adrenaline 1uM      | 1000    | 0.155253 | 0.137498 | 0.100439 | 0.120503 | 0.013378 | -0.00822 | <b>0.086475</b> | <b>0.067819</b> |              | Adrenaline 1uM      | 1000    | 0.289071 | 0.109531 | 0.118544 | 0.143075 | 0.072936 | 0.041349 | 0.07664  | 0.153219 | 0.152798 | 0.107439 | 0.157874 | 0.150286 | <b>0.131063</b> | <b>0.062326</b> | <b>0.104326</b> |
| Adrenaline 100nM    | 100     | 0.004206 | -0.00584 | 0.001725 | 0.026291 |          |          | <b>0.006595</b> | <b>0.013809</b> |              | Adrenaline 100nM    | 100     | 0.023548 | 0.011804 | 0.022636 | 0.031326 | 0.028094 | -0.12746 | -0.0394  | 0.025233 | 0.031774 | 0        | 0        | 0        | 0               | <b>0.000687</b> |                 |
| Adrenaline 10nM     | 10      | -0.0198  | 0.007868 | -0.00845 | 0.04204  |          |          | <b>0.005416</b> | <b>0.026927</b> |              | Adrenaline 10nM     | 10      | 0.014744 | 0.001621 | 0.014448 | 0.012697 | 0.026009 | -0.12534 | -0.00858 | 0.003152 | 0.017522 | 0        | 0        | 0        | 0               | <b>-0.00397</b> |                 |
| Adrenaline 1nM      | 1       | -0.0343  | -0.01639 | 0.000838 | -0.00435 |          |          | <b>-0.01355</b> | <b>0.015601</b> |              | Adrenaline 1nM      | 1       | 0.00012  | -0.02532 | 0.033895 | -0.02517 | 0.00936  | -0.139   | -0.02015 | 0.011234 | -0.04243 | 0        | 0        | 0        | 0               | <b>-0.01795</b> |                 |
| 10 min              |         |          |          |          |          |          |          |                 |                 | 10 min       |                     |         |          |          |          |          |          |          |          |          |          |          |          |          |                 |                 |                 |
| Base                | 1       | 2        | 3        | 4        | 5        | 6        | Ave.     | SD              |                 |              | Base                | 1       | 2        | 3        | 4        | 5        | 6        | 7        | 8        | 9        | 10       | 11       | 12       | Average  | SD              | T-test          |                 |
| Isoproterenol 5mM   | 5000000 | 0.650323 | 0.653414 | 0.596605 | 0.565789 |          |          | <b>0.616533</b> | <b>0.042716</b> |              | Isoproterenol 5mM   | 5000000 | 0.469615 | 0.605519 | 0.638631 | 0.658659 | 0.651187 | 0.58504  | 0.602827 | 0.586696 | 0.549822 | 0        | 0        | 0        | 0               | 0               | <b>0.48618</b>  |
| Isoproterenol 500uM | 500000  | 0.677198 | 0.626104 | 0.508777 | 0.441475 |          |          | <b>0.563388</b> | <b>0.107596</b> |              | Isoproterenol 500uM | 500000  | 0.505705 | 0.505436 | 0.600133 | 0.611908 | 0.531388 | 0.428744 | 0.455444 | 0.56219  | 0.452828 | 0        | 0        | 0        | 0               | 0               | <b>0.423071</b> |
| Isoproterenol 50uM  | 50000   | 0.545272 | 0.527306 | 0.499441 | 0.319967 | 0.171468 | 0.600625 | <b>0.444013</b> | <b>0.163987</b> |              | Isoproterenol 50uM  | 50000   | 0.69008  | 0.427835 | 0.363097 | 0.506611 | 0.287074 | 0.30101  | 0.238809 | 0.4337   | 0.361595 | 0.22787  | 0.399463 | 0.520767 | <b>0.396493</b> | <b>0.132411</b> | <b>0.276899</b> |
| Isoproterenol 5uM   | 5000    | 0.506127 | 0.377846 | 0.482369 | 0.178227 | 0.088993 | 0.596314 | <b>0.371646</b> | <b>0.199079</b> |              | Isoproterenol 5uM   | 5000    | 0.573857 | 0.357813 | 0.289166 | 0.421053 | 0.13344  | 0.240197 | 0.138893 | 0.274154 | 0.296574 | 0.18943  | 0.355666 | 0.481964 | <b>0.312684</b> | <b>0.134018</b> | <b></b>         |
