# Supplementary material for: Neurally mediated syncope diagnosis based on adenylate cyclase activity in Japanese patients
Source: PubMed Central journal article supplement (PMC6472876; doi:10.1371/journal.pone.0214733), 2019-04-18
Supplement: pone.0214733.s007.pdf [file pone.0214733.s007.pdf]

**S7 Table. The raw data of adenylate cyclase activities in the different seasons from three volunteers by adrenaline (AD) and isoproterenol (IP).**

|                     |       | (A) C38  | (A) C38  | (B) C11  | (B) C11  | (C) C41  | (C) C41  |
|---------------------|-------|----------|----------|----------|----------|----------|----------|
|                     |       | 20150817 | 20160707 | 20150605 | 20151109 | 20160715 | 20160929 |
| Adrenaline 1mM      | 1mM   | 0.67057  | 0.680594 | 0.665778 | 0.606962 | 0.681196 | 0.653925 |
| Adrenaline 100uM    | 100uM | 0.540641 | 0.506677 | 0.382489 | 0.437801 | 0.439848 | 0.458885 |
| Adrenaline 10uM     | 10uM  | 0.23604  | 0.261932 | 0.180688 | 0.173245 | 0.090222 | 0.111025 |
| Adrenaline 1uM      | 1uM   | 0.13971  | 0.113756 | 0.107534 | 0.108717 | 0.017669 | 0.07354  |
| Adrenaline 100nM    | 100nM | 0.039614 | -0.00944 | 0.00513  | 0.01664  | -0.00522 | 0.044332 |
| Adrenaline 10nM     | 10nM  | 0.015129 | 0.035078 | 0.000772 | -0.03691 | -0.0155  | 0.020914 |
| Adrenaline 1nM      | 1nM   | 0.046947 | 0.011143 | 0.019697 | -0.02545 | 0.000881 | 0.008347 |
|                     |       |          |          |          |          |          |          |
|                     |       | (A) C38  | (A) C38  | (B) C11  | (B) C11  | (C) C41  | (C) C41  |
|                     |       | 20150817 | 20160707 | 20150605 | 20151109 | 20160715 | 20160929 |
| Isopreterenol 5mM   | 5mM   | 0.67403  | 0.695884 | 0.669095 | 0.653095 | 0.704314 | 0.678168 |
| Isopreterenol 500uM | 500uM | 0.650422 | 0.627609 | 0.608009 | 0.585391 | 0.588315 | 0.549981 |
| Isopreterenol 50uM  | 50uM  | 0.414308 | 0.351528 | 0.288006 | 0.340537 | 0.20909  | 0.216537 |
| Isopreterenol 5uM   | 5uM   | 0.24785  | 0.255737 | 0.188182 | 0.193463 | 0.079477 | 0.113567 |
| Isopreterenol 500nM | 500nM | 0.192454 | 0.193664 | 0.123776 | 0.123229 | 0.013094 | 0.10231  |
| Isopreterenol 50nM  | 50nM  | 0.054565 | 0.05684  | 0.037773 | -0.00865 | -0.03929 | 0.030603 |
| Isopreterenol 5nM   | 5nM   | 0.026084 | -0.04086 | 0.010342 | -0.02485 | -0.04243 | 0.021786 |
