# Supplementary material for: Neurally mediated syncope diagnosis based on adenylate cyclase activity in Japanese patients
Source: PubMed Central journal article supplement (PMC6472876; doi:10.1371/journal.pone.0214733), 2019-04-18
Supplement: pone.0214733.s008.pdf [file pone.0214733.s008.pdf]

**S8 Table. The raw data of adenylate cyclase activities in the different seasons from C41 volunteer by adrenaline (AD) and isoproterenol (IP).**

| Baseline             | 2016/7/15_C 41-1 | 2016/9/29_C41-1 | 70°                  | 2016/7/15_C 41-2 | 2016/9/29_C41-2 | after 10 minutes     | 2016/7/15_C 41-3 | 2016/9/29_C41-3 | after 20 minutes     | 2016/7/15_C 41-4 | 2016/9/29_C41-4 |
|----------------------|------------------|-----------------|----------------------|------------------|-----------------|----------------------|------------------|-----------------|----------------------|------------------|-----------------|
| Adrenaline 1 mM      | 0.681196113      | 0.653925033     | Adrenaline 1 mM      | 0.577939833      | 0.631303649     | Adrenaline 1 mM      | 0.5692913        | 0.621837861     | Adrenaline 1 mM      | 0.571094134      | 0.647850346     |
| Adrenaline 100 uM    | 0.439847737      | 0.458885064     | Adrenaline 100 uM    | 0.410099775      | 0.412418639     | Adrenaline 100 uM    | 0.442314865      | 0.446216021     | Adrenaline 100 uM    | 0.435057911      | 0.467595924     |
| Adrenaline 10 uM     | 0.090222385      | 0.111102539     | Adrenaline 10 uM     | 0.131509913      | 0.104945267     | Adrenaline 10 uM     | 0.133840085      | 0.163301567     | Adrenaline 10 uM     | 0.197732676      | 0.201285095     |
| Adrenaline 1 uM      | 0.017669163      | 0.073539919     | Adrenaline 1 uM      | 0.06308888       | 0.072935686     | Adrenaline 1 uM      | 0.062601684      | 0.076393392     | Adrenaline 1 uM      | 0.088809572      | 0.113070168     |
| Adrenaline 100 nM    | -0.005222152     | 0.044331786     | Adrenaline 100 nM    | -0.006361456     | 0.028093621     | Adrenaline 100 nM    | 0.007657054      | 0.040757942     | Adrenaline 100 nM    | 0.045535149      | 0.05310383      |
| Adrenaline 10 nM     | -0.015496291     | 0.020913697     | Adrenaline 10 nM     | -0.006748363     | 0.026008587     | Adrenaline 10 nM     | 0.001580496      | 0.040138371     | Adrenaline 10 nM     | 0.032084405      | 0.052211269     |
| Adrenaline 1 nM      | 0.000881167      | 0.008346955     | Adrenaline 1 nM      | -0.030284004     | 0.009360127     | Adrenaline 1 nM      | -0.006248661     | 0.031314539     | Adrenaline 1 nM      | 0.02304824       | 0.037719033     |
|                      | 2016/7/15_C 41-1 | 2016/9/29_C41-1 |                      | 2016/7/15_C 41-2 | 2016/9/29_C41-2 |                      | 2016/7/15_C 41-3 | 2016/9/29_C41-3 |                      | 2016/7/15_C 41-4 | 2016/9/29_C41-4 |
| Isoproterenol 5 mM   | 0.70431352       | 0.678167639     | Isoproterenol 5 mM   | 0.604583599      | 0.657979519     | Isoproterenol 5 mM   | 0.588528336      | 0.651187329     | Isoproterenol 5 mM   | 0.604432722      | 0.629867318     |
| Isoproterenol 500 uM | 0.588314875      | 0.549981374     | Isoproterenol 500 uM | 0.525597604      | 0.519892938     | Isoproterenol 500 uM | 0.53169037       | 0.531388019     | Isoproterenol 500 uM | 0.512612186      | 0.533342781     |
| Isoproterenol 50 uM  | 0.20909015       | 0.216537372     | Isoproterenol 50 uM  | 0.227263518      | 0.164946313     | Isoproterenol 50 uM  | 0.30250403       | 0.287074222     | Isoproterenol 50 uM  | 0.343663139      | 0.298672273     |
| Isoproterenol 5 uM   | 0.079477021      | 0.11356683      | Isoproterenol 5 uM   | 0.131486938      | 0.111924559     | Isoproterenol 5 uM   | 0.156699226      | 0.133440262     | Isoproterenol 5 uM   | 0.204952943      | 0.140863379     |
| Isoproterenol 500 nM | 0.013093756      | 0.102309993     | Isoproterenol 500 nM | 0.09318862       | 0.054601732     | Isoproterenol 500 nM | 0.081058452      | 0.08328681      | Isoproterenol 500 nM | 0.117974675      | 0.069728912     |
| Isoproterenol 50 nM  | -0.039294357     | 0.030603126     | Isoproterenol 50 nM  | -0.014381743     | 0.02607083      | Isoproterenol 50 nM  | 0.018682844      | 0.031046119     | Isoproterenol 50 nM  | 0.041354539      | -0.00315075     |
| Isoproterenol 5 nM   | -0.042426339     | 0.021785949     | Isoproterenol 5 nM   | -0.021363537     | -0.004393549    | Isoproterenol 5 nM   | -0.01026813      | 0.011616039     | Isoproterenol 5 nM   | 0.013480592      | 0.005228001     |
