# Supplementary material for: Neurally mediated syncope diagnosis based on adenylate cyclase activity in Japanese patients
Source: PLoS One. 2019 Apr 18;14(4):e0214733. doi: 10.1371/journal.pone.0214733 (PMC6472876; doi:10.1371/journal.pone.0214733)
Supplement: S4 Table — (PDF) [file pone.0214733.s004.pdf]

**S4 Table. The raw data of adenylate cyclase activities from 22 healthy volunteers and 6 MT patients at rest time by adrenaline (AD) and isoproterenol (IP).**

| NMS (MT) n=6            |         |          |          |          |          |          |          |          |          |          |          |          |          |          |          |          |          |          |          |          |          |          |          |          |          |  |  |  |  |  |  |  |
|-------------------------|---------|----------|----------|----------|----------|----------|----------|----------|----------|----------|----------|----------|----------|----------|----------|----------|----------|----------|----------|----------|----------|----------|----------|----------|----------|--|--|--|--|--|--|--|
|                         |         | 1        | 2        | 3        | 4        | 5        | 6        |          |          |          |          |          |          |          |          |          |          |          |          |          |          |          |          |          |          |  |  |  |  |  |  |  |
| Rest time               |         | S012-1   | S013-1   | S014-1   | 15S023-1 | 15S039   | 15S040   | Ave.     | SD       | T-test   |          |          |          |          |          |          |          |          |          |          |          |          |          |          |          |  |  |  |  |  |  |  |
| Adrenaline 1mM          | 1000000 | 0.602188 | 0.703524 | 0.609078 | 0.547432 |          |          | 0.615555 | 0.064807 |          |          |          |          |          |          |          |          |          |          |          |          |          |          |          |          |  |  |  |  |  |  |  |
| Adrenaline 100uM        | 100000  | 0.477584 | 0.546374 | 0.459416 | 0.425863 | 0.553276 | 0.498887 | 0.493567 | 0.049775 | 0.067354 |          |          |          |          |          |          |          |          |          |          |          |          |          |          |          |  |  |  |  |  |  |  |
| Adrenaline 10uM         | 10000   | 0.251743 | 0.307234 | 0.294726 | 0.206934 | 0.184153 | 0.262383 | 0.251196 | 0.048196 | 0.017268 |          |          |          |          |          |          |          |          |          |          |          |          |          |          |          |  |  |  |  |  |  |  |
| Adrenaline 1uM          | 1000    | 0.119948 | 0.161568 | 0.172037 | 0.098696 | 0.047194 | 0.063337 | 0.110463 | 0.050706 | 0.044136 |          |          |          |          |          |          |          |          |          |          |          |          |          |          |          |  |  |  |  |  |  |  |
| Adrenaline 100nM        | 100     | -0.0088  | 0.009609 | 0.041574 | 0.013837 |          |          | 0.014056 | 0.020811 |          |          |          |          |          |          |          |          |          |          |          |          |          |          |          |          |  |  |  |  |  |  |  |
| Adrenaline 10nM         | 10      | -0.01817 | -0.02039 | 0.043742 | 0.012973 |          |          | 0.004538 | 0.03025  |          |          |          |          |          |          |          |          |          |          |          |          |          |          |          |          |  |  |  |  |  |  |  |
| Adrenaline 1nM          | 1       | -0.04184 | -0.03327 | -0.00215 | -0.01919 |          |          | -0.02411 | 0.017366 |          |          |          |          |          |          |          |          |          |          |          |          |          |          |          |          |  |  |  |  |  |  |  |
| Healthy volunteers n=22 |         |          |          |          |          |          |          |          |          |          |          |          |          |          |          |          |          |          |          |          |          |          |          |          |          |  |  |  |  |  |  |  |
|                         |         | 1        | 2        | 3        | 4        | 5        | 6        | 7        | 8        | 9        | 10       | 11       | 12       | 13       | 14       | 15       | 16       | 17       | 18       | 19       | 20       | 21       | 22       | Ave.     | SD       |  |  |  |  |  |  |  |
| Rest time               |         | c11      | c12      | c15      | c18      | c19-1    | c21      | c22      | c27      | C48      | C31      | C32      | C34      | C36-1    | C37-1    | C38-1    | C40-1    | C41-1    | C44      | C45      | C46-1    | C51      | C53      |          |          |  |  |  |  |  |  |  |
| Adrenaline 1mM          | 1000000 | 0.665778 | 0.709712 | 0.605874 | 0.679459 | 0.66414  | 0.648605 | 0.659015 | 0.627572 | 0.560823 | 0.619857 | 0.598856 | 0.643871 | 0.521069 | 0.636478 | 0.680594 | 0.698643 | 0.653925 | 0.595107 | 0.618414 | 0.642209 |          |          | 0.6365   | 0.045584 |  |  |  |  |  |  |  |
| Adrenaline 100uM        | 100000  | 0.382489 | 0.684619 | 0.517828 | 0.671012 | 0.483418 | 0.488458 | 0.535409 | 0.266942 | 0.470625 | 0.689506 | 0.358322 | 0.529993 | 0.761974 | 0.473305 | 0.506677 | 0.504345 | 0.458885 | 0.500938 | 0.618381 | 0.585582 | 0.61892  | 0.675834 | 0.535612 | 0.119677 |  |  |  |  |  |  |  |
| Adrenaline 10uM         | 10000   | 0.180688 | 0.493032 | 0.450436 | 0.620559 | 0.333002 | 0.222251 | 0.275791 | 0.114208 | 0.371972 | 0.485896 | 0.247573 | 0.446659 | 0.648401 | 0.318276 | 0.261932 | 0.259273 | 0.111025 | 0.34603  | 0.394816 | 0.283347 | 0.416767 | 0.504962 | 0.35395  | 0.14584  |  |  |  |  |  |  |  |
| Adrenaline 1uM          | 1000    | 0.107534 | 0.320296 | 0.283733 | 0.474591 | 0.154205 | 0.096315 | 0.210773 | 0.091961 | 0.174706 | 0.238154 | 0.078    | 0.264956 | 0.276602 | 0.127793 | 0.113756 | 0.127035 | 0.07354  | 0.170153 | 0.155721 | 0.139345 | 0.209908 | 0.233382 | 0.187385 | 0.096448 |  |  |  |  |  |  |  |
| Adrenaline 100nM        | 100     | 0.00513  | 0.032779 | 0.096791 | 0.072024 | -0.01772 | 0.045393 | 0.006167 | -0.0068  | 0.027011 | 0.020975 | 0.043213 | 0.056215 | 0.004949 | 0.000302 | -0.00944 | 0.049311 | 0.044332 | 0.020905 | -0.00616 | 0.014158 |          |          | 0.024977 | 0.029931 |  |  |  |  |  |  |  |
| Adrenaline 10nM         | 10      | 0.000772 | 0.038757 | 0.064506 | 0.007085 | -0.00368 | 0.001048 | 0.027036 | 0.006591 | 0.027658 | -0.02026 | 0.019966 | 0.033297 | -0.01609 | -0.00296 | 0.035078 | 0.047313 | 0.020914 | 0.004542 | -0.01043 | 0.003003 |          |          | 0.014208 | 0.022315 |  |  |  |  |  |  |  |
| Adrenaline 1nM          | 1       | 0.019697 | -0.00545 | 0.036996 | -1.2E-05 | 0.030544 | -0.00934 | 0.036254 | -0.00643 | -0.01318 | -0.02535 | 0.009534 | 0.027782 | -0.03253 | -0.01143 | 0.011143 | 0.010164 | 0.008347 | -0.00524 | -0.02445 | 0.006562 |          |          | 0.00318  | 0.020253 |  |  |  |  |  |  |  |
| NMS (MT) n=6            |         |          |          |          |          |          |          |          |          |          |          |          |          |          |          |          |          |          |          |          |          |          |          |          |          |  |  |  |  |  |  |  |
|                         |         | 1        | 2        | 3        | 4        | 5        | 6        |          |          |          |          |          |          |          |          |          |          |          |          |          |          |          |          |          |          |  |  |  |  |  |  |  |
| Rest time               |         | S012-1   | S013-1   | S014-1   | 15S023-1 | 15S039   | 15S040   | Ave.     | SD       | T-test   |          |          |          |          |          |          |          |          |          |          |          |          |          |          |          |  |  |  |  |  |  |  |
| Isopreterenol 5mM       | 5000000 | 0.629416 | 0.699681 | 0.640418 | 0.588653 |          |          | 0.639542 | 0.045861 |          |          |          |          |          |          |          |          |          |          |          |          |          |          |          |          |  |  |  |  |  |  |  |
| Isopreterenol 500uM     | 500000  | 0.559633 | 0.635825 | 0.53767  | 0.517951 |          |          | 0.562769 | 0.051593 |          |          |          |          |          |          |          |          |          |          |          |          |          |          |          |          |  |  |  |  |  |  |  |
| Isopreterenol 50uM      | 50000   | 0.367988 | 0.386541 | 0.353047 | 0.326346 | 0.196832 | 0.239483 | 0.311706 | 0.076293 | 0.00396  |          |          |          |          |          |          |          |          |          |          |          |          |          |          |          |  |  |  |  |  |  |  |
| Isopreterenol 5uM       | 5000    | 0.292338 | 0.294398 | 0.311931 | 0.228663 | 0.145699 | 0.175552 | 0.24143  | 0.069333 | 0.005017 |          |          |          |          |          |          |          |          |          |          |          |          |          |          |          |  |  |  |  |  |  |  |
| Isopreterenol 500nM     | 500     | 0.179299 | 0.213354 | 0.188547 | 0.143998 | 0.135114 | 0.16402  | 0.170722 | 0.029106 | 0.003546 |          |          |          |          |          |          |          |          |          |          |          |          |          |          |          |  |  |  |  |  |  |  |
| Isopreterenol 50nM      | 50      | -0.04658 | 0.044483 | 0.050312 | 0.035112 |          |          | 0.020831 | 0.045377 |          |          |          |          |          |          |          |          |          |          |          |          |          |          |          |          |  |  |  |  |  |  |  |
| Isopreterenol 5nM       | 5       | -0.02739 | -0.03118 | 0.011821 | -0.03079 |          |          | -0.01939 | 0.020875 |          |          |          |          |          |          |          |          |          |          |          |          |          |          |          |          |  |  |  |  |  |  |  |
| Healthy volunteers n=22 |         |          |          |          |          |          |          |          |          |          |          |          |          |          |          |          |          |          |          |          |          |          |          |          |          |  |  |  |  |  |  |  |
|                         |         | 1        | 2        | 3        | 4        | 5        | 6        | 7        | 8        | 9        | 10       | 11       | 12       | 13       | 14       | 15       | 16       | 17       | 18       | 19       | 20       | 21       | 22       | Ave.     | SD       |  |  |  |  |  |  |  |
| Rest time               |         | c11      | c12      | c15      | c18      | c19-1    | c21      | c22      | c27      | C48      | C31      | C32      | C34      | C36-1    | C37-1    | C38-1    | C40-1    | C41-1    | C44      | C45      | C46-1    | C51      | C53      |          |          |  |  |  |  |  |  |  |
| Isoproterenol 5mM       | 5000000 | 0.669095 | 0.703023 | 0.623355 | 0.690352 | 0.673022 | 0.699203 | 0.708399 | 0.675712 | 0.586175 | 0.69715  | 0.710542 | 0.703129 | 0.575502 | 0.66463  | 0.695884 | 0.692927 | 0.678168 | 0.611632 | 0.652262 | 0.66928  |          |          | 0.668972 | 0.040051 |  |  |  |  |  |  |  |
| Isoproterenol 500uM     | 500000  | 0.608009 | 0.757064 | 0.566149 | 0.687068 | 0.681287 | 0.630683 | 0.681743 | 0.517073 | 0.53584  | 0.69555  | 0.681416 | 0.736972 | 0.685033 | 0.545955 | 0.627609 | 0.598349 | 0.549981 | 0.537974 | 0.685699 | 0.621838 |          |          | 0.631565 | 0.071952 |  |  |  |  |  |  |  |
| Isoproterenol 50uM      | 50000   | 0.288006 | 0.546953 | 0.487765 | 0.651297 | 0.468436 | 0.3163   | 0.428554 | 0.180695 | 0.444081 | 0.616843 | 0.362266 | 0.492994 | 0.765834 | 0.441879 | 0.351528 | 0.339658 | 0.216537 | 0.430339 | 0.513744 | 0.363962 | 0.45709  | 0.590449 | 0.443419 | 0.140251 |  |  |  |  |  |  |  |
| Isoproterenol 5uM       | 5000    | 0.188182 | 0.496038 | 0.440036 | 0.658714 | 0.327386 | 0.204281 | 0.262864 | 0.12156  | 0.409016 | 0.490538 | 0.277363 | 0.4665   | 0.640779 | 0.356776 | 0.255737 | 0.26817  | 0.113567 | 0.362864 | 0.43042  | 0.274708 | 0.436873 | 0.527037 | 0.364064 | 0.150783 |  |  |  |  |  |  |  |
| Isoproterenol 500nM     | 500     | 0.123776 | 0.362219 | 0.331471 | 0.52107  | 0.203149 | 0.135653 | 0.22689  | 0.093842 | 0.247488 | 0.329655 | 0.167712 | 0.343476 | 0.358901 | 0.149965 | 0.193664 | 0.172408 | 0.10231  | 0.212486 | 0.276707 | 0.196201 | 0.295521 | 0.395715 | 0.247285 | 0.109484 |  |  |  |  |  |  |  |
| Isoproterenol50nM       | 50      | 0.037773 | 0.07921  | 0.117023 | 0.071785 | -0.02106 | 0.045873 | 0.008457 | 0.01532  | 0.04824  | 0.021355 | 0.018697 | 0.050615 | -0.00447 | -0.03872 | 0.05684  | 0.102597 | 0.030603 | -0.00243 | 0.001456 | 0.010148 |          |          | 0.032466 | 0.039961 |  |  |  |  |  |  |  |
| Isoproterenol 5nM       | 5       | 0.010342 | 0.007737 | 0.026485 | 0.008271 | -0.0284  | 0.023353 | -0.01194 | -0.02223 | -0.02629 | -0.01318 | -0.04152 | -0.00162 | -0.02807 | -0.02625 | -0.04086 | -0.00476 | 0.021786 | -0.0364  | -0.05255 | -0.00086 |          |          | -0.01185 | 0.023441 |  |  |  |  |  |  |  |
